# Supplementary material for: Rare Coding Variants in Patients with Non-Syndromic Vestibular Dysfunction
Source: MDPI journal article supplement (doi:10.3390/genes14040831), 2023-03-30
Supplement: s1 [file s1]

**Table S1.** Adolescent patients with lateral semicircular canal asymmetry and idiopathic scoliosis (Carry et al. 2020).

| <b>ID</b> | <b>Age (years)</b> | <b>Curve type</b> | <b>Size of curve (Cobb angle)</b> |
|-----------|--------------------|-------------------|-----------------------------------|
| 1         | 14.5               | Thoracic          | 47                                |
| 2         | 11.6               | Thoracic+Lumbar   | 30/28                             |
| 3         | 11.9               | Thoracic+Lumbar   | 43/38                             |
| 4         | 14                 | Thoracic+Lumbar   | 59/52                             |
| 5         | 12                 | Thoracic+Lumbar   | 56/37                             |
| 6         | 15                 | Thoracic+Lumbar   | 41/47                             |
| 7         | 17                 | Thoracic+Lumbar   | 35/28                             |
| 8         | 16                 | Thoracic+Lumbar   | 37/14                             |
| 9         | 16                 | Thoracic+Lumbar   | 42/21                             |
| 10        | 16                 | Thoracic+Lumbar   | 50/50                             |

**Table S4.** *OTOP1* (NM\_177998.1) exon 6 variants on hg19 chromosome 4 that were identified in US adolescents with asymmetry of the lateral semicircular canals by MRI (n=11).

| hg19 position | Reference allele | Alternate allele | cDNA variant | Amino acid variant | Highest MAF     | Damaging prediction (dbNSFP42a) | Scaled CADD score |
|---------------|------------------|------------------|--------------|--------------------|-----------------|---------------------------------|-------------------|
| 4228586       | G                | A                | c.6C>T       | p.(=)              | (AU)Afr: 0.035  | na                              | 1.26              |
| 4228563       | G                | C                | c.29C>G      | p.(Ser10Trp)       | Bravo: 7.96E-6  | SI                              | 14.98             |
| 4228547       | T                | C                | c.45A>G      | p.(=)              | 0               | na                              | 2.05              |
| 4228538       | C                | T                | c.54G>A      | p.(=)              | (AU)Lat: 3.3E-5 | na                              | 3.39              |
| 4228526       | C                | T                | c.66G>A      | p.(=)              | 0               | na                              | 0.74              |
| 4228517       | T                | G                | c.75A>C      | p.(=)              | 0               | na                              | 2.21              |
| 4228507       | A                | G                | c.85T>C      | p.(Ser29Pro)       | 0               | .                               | 4.35              |
| 4228493       | G                | C                | c.99C>G      | p.(=)              | OTH: 0.003      | na                              | 1.98              |
| 4228456       | G                | T                | c.136C>A     | p.(=)              | SAS: 0.27       | na                              | 4.56              |

*Abbreviations:* Afr: African; (AU): All of Us database; CADD: Combined Annotation Dependent Depletion; Lat: Latin American; OTH: gnomAD Other; SAS: gnomAD South Asian; SI, SIFT deleterious. All 11 adolescents were heterozygous for 9 out of 11 variants (except c.45A>G and c.75A>C), suggesting that these variants are in strong linkage disequilibrium. Out of 11 individuals with lateral semicircular canal asymmetry, 10 were diagnosed with idiopathic scoliosis, while one was labeled as a control individual with normal spine.

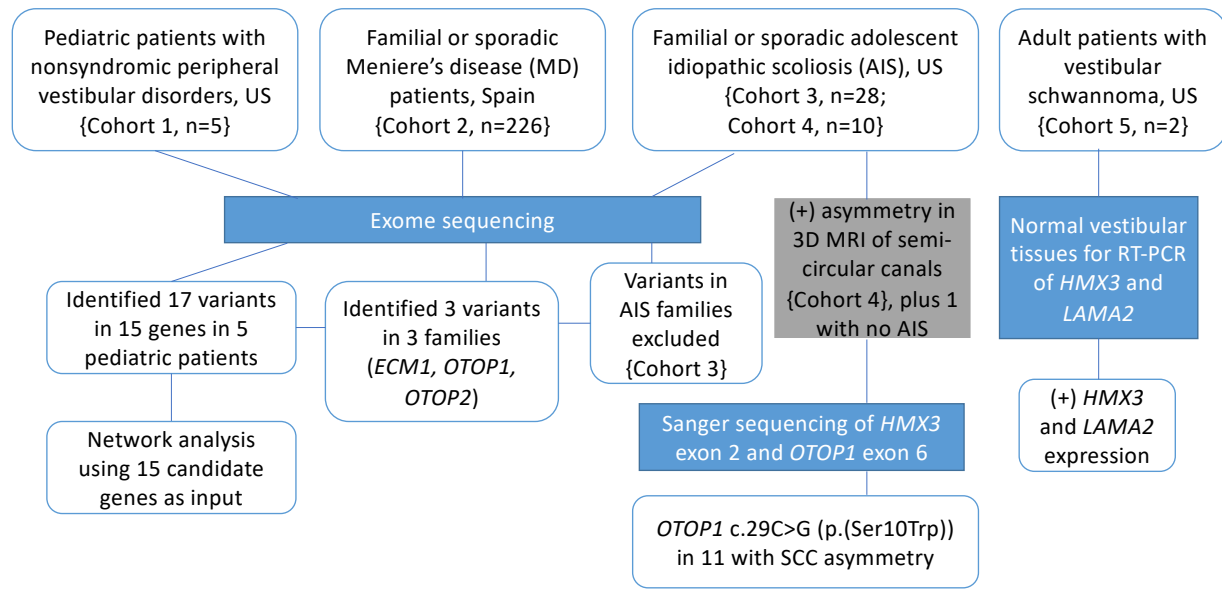

**Figure S1.** Study flowchart.

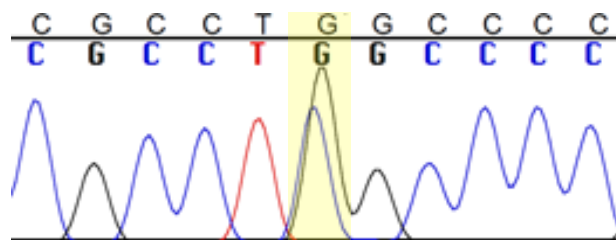

**Figure S2.** *OTOF1* c.29C>G (p.(Ser10Trp)) variant identified by Sanger sequencing in 11 patients with lateral semicircular canal asymmetry, 10 of whom had idiopathic scoliosis.
